# Supplementary material for: Application of the direct peptide reactivity assay (DPRA) to inorganic compounds: a case study of platinum species
Source: Royal Society of Chemistry journal article supplement (doi:10.1039/c9tx00242a), 2019-11-01
Supplement: c9tx00242a2.pdf [file c9tx00242a2.pdf]

Table S1. Details of Test Chemicals

| Compound                                      | Vendor          |
|-----------------------------------------------|-----------------|
| <b>Potassium Hexachloroplatinate (lot A)</b>  | Alfa Aesar      |
| <b>(lot B)</b>                                |                 |
| <b>Potassium Tetrachloroplatinate (lot A)</b> | Alfa Aesar      |
| <b>(lot B)</b>                                |                 |
| <b>Hydrogen Hexahydroxy Platinate</b>         | Johnson Matthey |
| <b>Potassium Tetranitroplatinate</b>          | Aldrich         |
| <b>Tetraammineplatinum chloride</b>           |                 |
| <b>(Aldrich 323330-Lot A)</b>                 | Aldrich         |
| <b>(Aldrich 323330-Lot B)</b>                 | Aldrich         |
| <b>(Alfa Aesar 10544)</b>                     | Alfa Aesar      |
| <b>(Alfa Aesar 10836 Bottle A)</b>            | Alfa Aesar      |
| <b>(Alfa Aesar 10836 Bottle B)</b>            | Alfa Aesar      |
| <b>Tetraammineplatinum nitrate</b>            | Aldrich         |
| <b>Tetraammineplatinum hydrogen carbonate</b> | Alfa Aesar      |
| <b>Tetraammineplatinum hydroxide</b>          | Alfa Aesar      |
| <b>Cisplatin</b>                              | Sigma           |
| <b>Transplatin</b>                            | Alpha Aesar     |
| <b>Potassium trichloroammineplatinate</b>     | Alpha Aesar     |
| <b>Cobalt Chloride</b>                        | CDI Repository  |
| <b>Tetraamminepalladium(II)dichloride</b>     | Alpha Aesar     |
| <b>Potassium Tetrachloropalladate</b>         | Alpha Aesar     |

| Catalogue #<br>Product Code | Lot/Batch          | Molecular<br>Weight | Linear Formula                 | Oxidation<br>State | CAS #       |
|-----------------------------|--------------------|---------------------|--------------------------------|--------------------|-------------|
| 12169                       | Y23B008<br>W13C087 | 486.01              | $K_2PtCl_6$                    | IV                 | 16921-30-5  |
| 43946                       | T01B036<br>U09C015 | 415.11              | $K_2PtCl_4$                    | II                 | 10025-99-7  |
| 186001                      | CA0160             | 299.14              | $H_2Pt(OH)_6$                  | IV                 | 51850-20-5  |
| 249963                      | MKBP9956V          | 457.3               | $K_2Pt(NO_2)_4$                | II                 | 13815-39-9  |
| 323330                      | MKBT4826V          | 334.11 (anhy)       | $Pt(NH_3)_4Cl_2 \cdot xH_2O$   | II                 | 108374-32-9 |
| 323330                      | MKBZ7171V          |                     |                                |                    |             |
| 10544                       | R26C034            |                     | $Pt(NH_3)_4Cl_2 \cdot H_2O$    |                    | 13933-33-0  |
| 10836                       | CY0020             |                     |                                |                    | 13933-33-0  |
| 10836                       | CY0020             |                     |                                |                    | 13933-33-0  |
| 482293                      | MKBV7221V          | 387.21              | $Pt(NH_3)_4(NO_3)_2$           | II                 | 20634-12-2  |
| 44042                       | K06Y046            | 385.24              | $[Pt(NH_3)_4](HCO_3)_2$        | II                 | 123439-82-7 |
| 46319                       | W21B008            | 297.23 (anhy)       | $(NH_3)_4Pt(OH)_2 \cdot xH_2O$ | II                 | 312695-70-8 |
| P4394                       | MKBD6877V          | 300.05              | $Pt(NH_3)_2Cl_2$               | II                 | 15663-27-1  |
| 10472                       | CF0118             | 300.06              | $PtCl_2(NH_3)_2$               | II                 | 14913-33-8  |
| 39433                       | H27Y044            | 357.56              | $K(PtCl_3NH_3)$                | II                 | 13820-91-2  |
| C74.4-PTL                   | 10/31/2016         | 237.93              | $CoCl_2 \cdot 6H_2O$           | II                 | 7791-13-1   |
| 11036                       | T31D025            | 245.43 (anhy)       | $Pd(NH_3)_4Cl_2 \cdot H_2O$    | II                 | 13933-31-8  |
| 11885                       | U21D065            | 326.42              | $K_2PdCl_4$                    | II                 | 10025-98-6  |

## Purity

99.99% 40.04%Pt total metallic impurities <100 ppm

99.99% 40.04%Pt total metallic impurities <100 ppm

99.99% Premion® 46.87% Pt Total metallic impurities < 100 ppm

99.99% Premion® 46.87% Pt Total metallic impurities < 100 ppm

64.82% Pt

98% 42.3%Pt

99.99% trace metals basis 53.7% Pt <200 ppm TM (130 ppm)

99.99% trace metals basis 51.2% Pt <150 ppm TM (16.5 ppm)

Pt 55.96 %

Premion® 99.995% (metals basis) Pt 54.74%

Premion® 99.995% (metals basis) Pt 54.74%

99.995% trace metals basis < 55 ppm TM (18.3)

Pt = 50.51 % Total impurities 243 ppm

Pt 58.86%

excluding Au Ag < 20ppm (6.8ppm) trace metal analysis < 100 ppm (50.7) 99.999%

64.83% Pt

95% minimum 53.3% Pt 29% Cl

25% Co

99.9% (metals basis) = Pd 40.03%

Premion® 99.99% (metals basis) Pd 32.48% Total metallic impurities < 100 ppm

## Weblink to Certificate of Analysis

<https://www.alfa.com/en/certs/certs1/12169-Y23B008.pdf>

<https://www.alfa.com/en/certs/certs1/12169-W13C087.pdf>

<https://www.alfa.com/en/certs/certs4/43946-T01B036.pdf>

<https://www.alfa.com/en/certs/certs4/43946-U09C015.pdf>

<https://www.sigmaaldrich.com/catalog/CertOfAnalysisPage.do?symbol=249963&LotNo=MKBP9956V&brandTest:>

<https://www.sigmaaldrich.com/catalog/CertOfAnalysisPage.do?symbol=323330&LotNo=MKBT4826V&brandTest:>

<https://www.sigmaaldrich.com/catalog/CertOfAnalysisPage.do?symbol=323330&LotNo=MKBZ7171V&brandTest:>

<https://www.alfa.com/en/certs/certs1/10544-R26C034.pdf>

<https://www.alfa.com/en/certs/certs1/10836-CY0020.pdf>

<https://www.alfa.com/en/certs/certs1/10836-CY0020.pdf>

<https://www.sigmaaldrich.com/catalog/CertOfAnalysisPage.do?symbol=482293&LotNo=MKBV7221V&brandTest:>

<https://www.alfa.com/en/certs/certs4/44042-K06Y046.pdf>

<https://www.alfa.com/en/certs/certs4/46319-W21B008.pdf>

<https://www.sigmaaldrich.com/catalog/CertOfAnalysisPage.do?symbol=P4394&LotNo=MKBD6877V&brandTest:>

<https://www.alfa.com/en/certs/certs1/10472-CF0118.pdf>

<https://www.alfa.com/en/certs/certs3/39433-H27Y044.pdf>

<https://www.alfa.com/en/certs/certs1/11036-T31D025.pdf>

<https://www.alfa.com/en/certs/certs1/11885-U21D065.pdf>

[=ALDRICH&returnUrl=%2Fproduct%2FALDRICH%2F249963](#)

[=ALDRICH&returnUrl=%2Fproduct%2FALDRICH%2F323330](#)

[=ALDRICH&returnUrl=%2Fproduct%2FALDRICH%2F323330](#)

[=ALDRICH&returnUrl=%2Fproduct%2FALDRICH%2F482293](#)
